# Supplementary material
Source: Royal Society of Chemistry journal article supplement (doi:10.1039/d6mh00077k)
Supplement: d6mh00077k1.pdf [file d6mh00077k1.pdf]

## Supporting Information

### **In-situ synthesis of dispersed borides induced high-performance brazed DD5 superalloy via a novel sandwich-structured interlayer**

Fushuai Jin, Jilong Wang, Wenhao Wang, Zhiwei Qin\*, Yutao Sun, Xiaolong Hong,

Yu Zhou, Jingkuan Wang, Peng Li, Shuyan Shi, Honggang Dong<sup>1\*</sup>

School of Materials Science and Engineering, Dalian University of Technology,

Dalian 116024, PR China

\* Corresponding author: E-mail: [qinzw@dlut.edu.cn](mailto:qinzw@dlut.edu.cn), [donghg@dlut.edu.cn](mailto:donghg@dlut.edu.cn)

---

<sup>1\*</sup> **Corresponding author.**

**E-mail address:** [donghg@dlut.edu.cn](mailto:donghg@dlut.edu.cn) (Honggang Dong), Tel: +86-411-84706283.

## Table of contents

1. Figure S1. Microstructural and crystallographic characterization.
2. Table S1. Elemental results of the EPMA points at the marked positions in Figure S1 (at.%).
3. Figure S2. Morphologies of metal ingots and foils.
4. Figure S3. Dimensions of tensile test specimens (unit: mm).
5. Table S2 Chemical compositions of the EPMA points at the marked positions in Fig. 2 (at.%).
6. Figure S4. Microstructure of precipitated phase of the joints.
7. Figure S5. Elements mapping results of Figure 2f.
8. Table S3. Comparison of welding processes
9. Figure S6. Nanoindentation results across different regions of the joints.
10. Figure S7. TEM analysis of the  $M_3B_2/\gamma$  interface.
11. Table S4. The formation enthalpy ( $\Delta H_f$ ) for all studied binary borides.
12. Figure S8. Nanoindentation results across different regions of the joints.

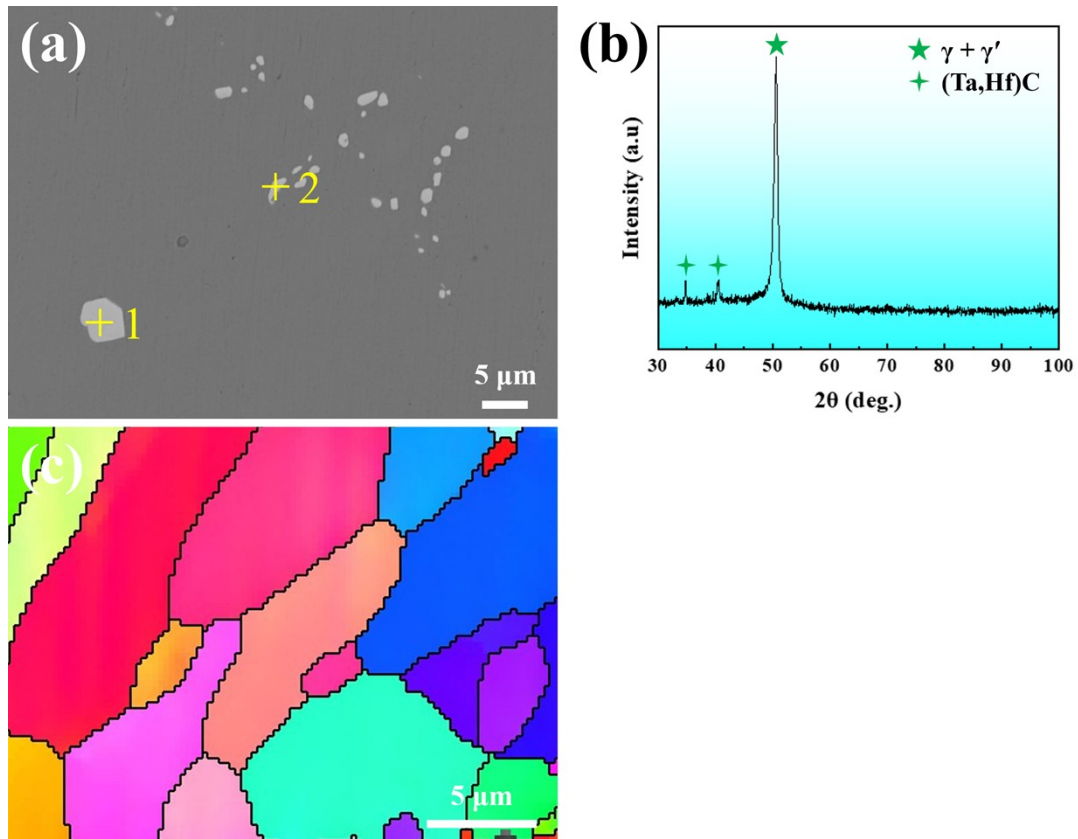

Figure S1. Microstructural and crystallographic characterization. (a) Microstructure of the DD5 base metal. (b) XRD pattern of the DD5 alloy. (c) Inverse pole figure (IPF) map of the NiCrWMoAlRe interlayer.

Table S1. Elemental results of the EPMA points at the marked positions in

Supplementary Figure 1 (at.%).

| Point | Ni    | Co   | Al   | Cr   | W    | Mo   | Ta    | Hf   | Re   | C     |
|-------|-------|------|------|------|------|------|-------|------|------|-------|
| 1     | 4.42  | 0.93 | 0    | 1.33 | 3.48 | 1.36 | 41.56 | 4.64 | 0    | 41.19 |
| 2     | 20.65 | 2.66 | 4.59 | 3.00 | 2.60 | 0.67 | 36.61 | 3.29 | 0.27 | 24.88 |

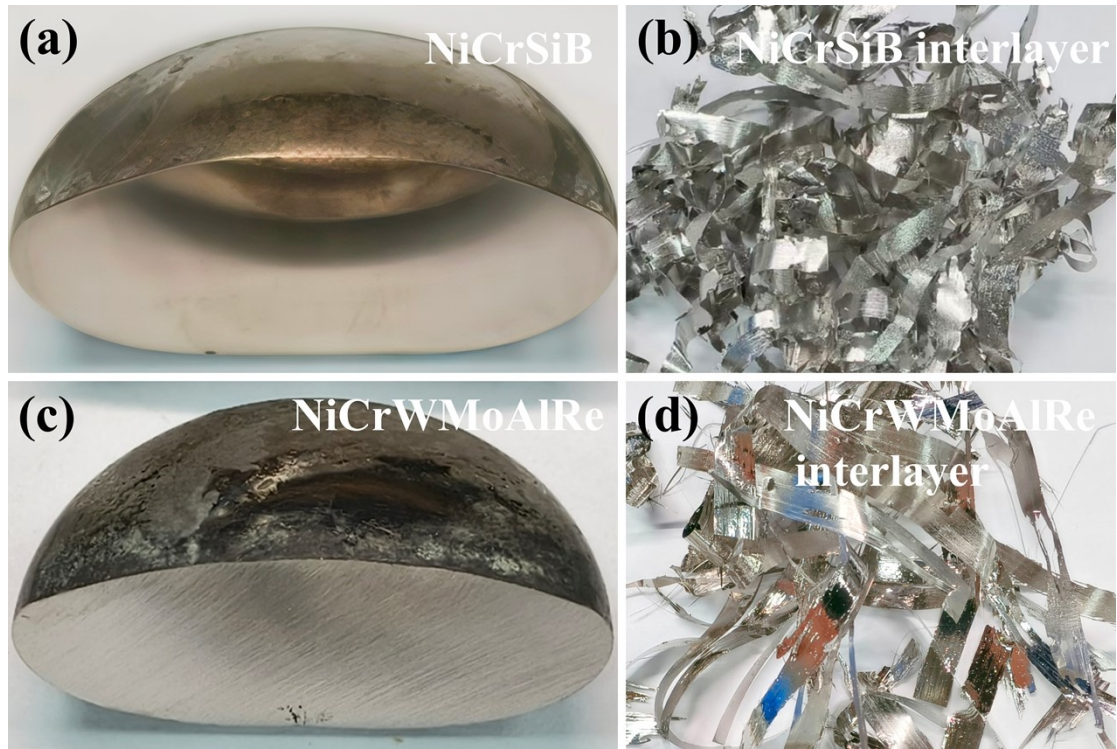

Figure S2. Morphologies of metal ingots and foils. (a) Metal ingot and (b) foil morphology of NiCrSiB; (c) Metal ingot and (d) foil morphology of NiCrWMoAlRe.

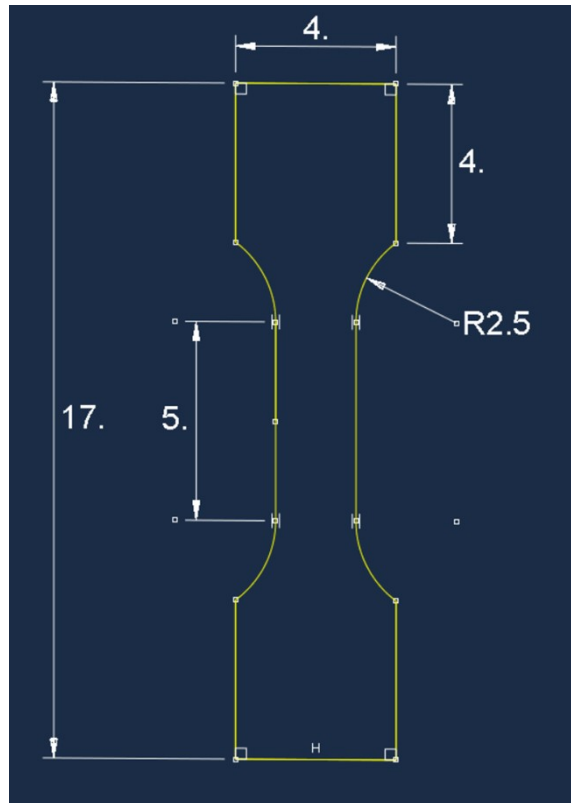

Figure S3. Dimensions of tensile test specimens (unit: mm)

Table S2. Chemical compositions of the EPMA points at the marked positions in Fig. 2 (at.%).

| Point | Ni    | Cr    | W    | Mo    | B     | Si   | Ta   | Al   | Possible Phase       |
|-------|-------|-------|------|-------|-------|------|------|------|----------------------|
| 1     | 16.13 | 24.85 | 6.25 | 4.62  | 38.30 | 0.51 | 0.34 | 0.76 | Cr/Mo/W-rich borides |
| 2     | 23.89 | 27.87 | 2.79 | 1.64  | 30.95 | 1.31 | 0.12 | 1.93 | Cr/Mo/W-rich borides |
| 3     | 74.28 | 8.90  | 0.54 | 0.18  | 0     | 4.75 | 0.56 | 4.32 | $\gamma + \gamma'$   |
| 4     | 76.47 | 4.99  | 0.27 | 0.10  | 8.34  | 0.41 | 1.94 | 3.06 | Ni-Si-B eutectic     |
| 5     | 75.96 | 8.56  | 0.29 | 0.14  | 0     | 8.61 | 0.09 | 2.12 |                      |
| 6     | 46.66 | 15.82 | 2.03 | 2.21  | 23.44 | 2.44 | 0.23 | 3.95 | Cr/Mo/W-rich borides |
| 7     | 14.40 | 40.77 | 5.38 | 7.28  | 26.99 | 0    | 0    | 0.09 | Cr/Mo/W-rich borides |
| 8     | 77.0  | 4.85  | 0.17 | 0.11  | 7.64  | 0.20 | 1.26 | 4.48 | Ni-rich borides      |
| 9     | 30.62 | 22.55 | 3.81 | 10.24 | 27.22 | 1.02 | 0    | 1.64 | Cr/Mo/W-rich borides |
| 10    | 72.03 | 8.30  | 1.84 | 2.42  | 0.05  | 2.28 | 0    | 8.86 | -                    |
| 11    | 75.55 | 8.79  | 0.44 | 0.28  | 0     | 3.90 | 0.32 | 6.07 | $\gamma + \gamma'$   |
| 12    | 77.16 | 7.43  | 0.52 | 0.21  | 0     | 4.78 | 0.40 | 7.67 | $\gamma + \gamma'$   |

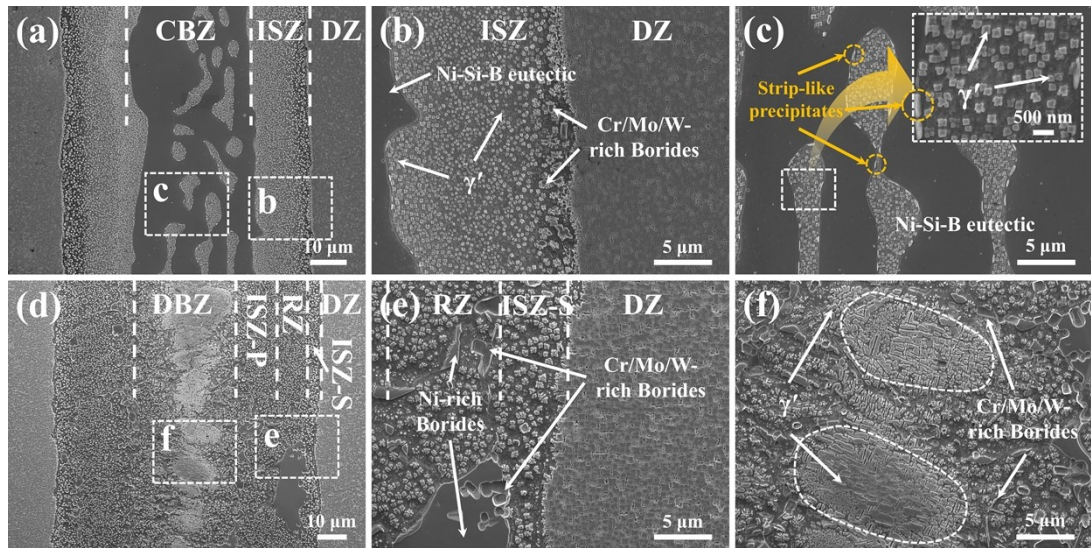

Figure S4. Microstructure of precipitated phase of the joints. (a) The microstructure of overall SC-joint. (b) The microstructure of ISZ and DZ. (c) The microstructure of CBZ. (d) The microstructure of overall SS-joint. (e) The microstructure of RZ, ISZ-S and DZ. (f) The microstructure of DBZ.

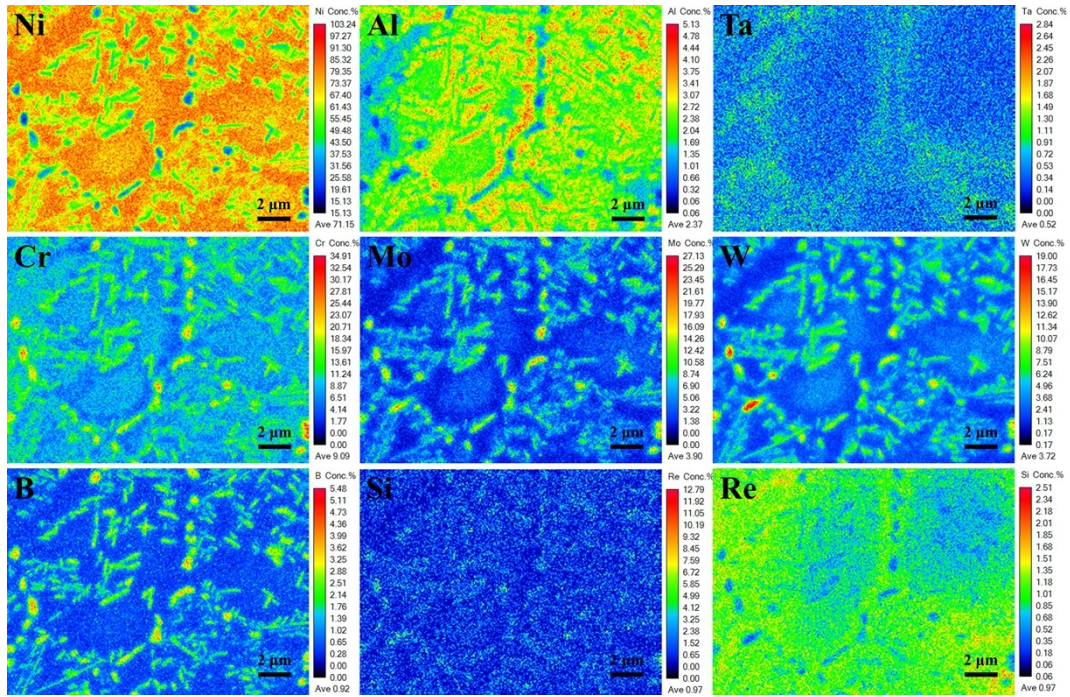

Figure S5. Elements mapping results of Figure 2f.

Table S3. Comparison of welding processes

|                              | This work             | Si/B-free fillers | Partial TLP           | Mortise-tenon structures |
|------------------------------|-----------------------|-------------------|-----------------------|--------------------------|
| Parameters                   | 1100 °C for 20 min    | 1200°C for 30 min | 1260°C for 60 min     | 1280°C for 60 min        |
| Key microstructural features | Dispersed Boride Zone | No borides        | Epitaxial Growth Zone | Polycrystalline Joint    |
| Complexity                   | Moderate              | Moderate          | Precise               | Very High                |

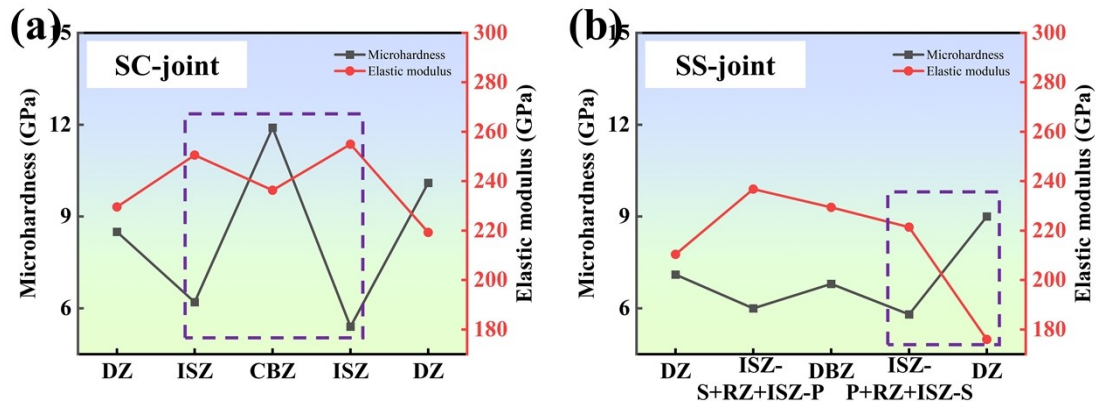

Figure S6. Nanoindentation results across different regions of the joints. (a) SC-joint. (b) SS-joint.

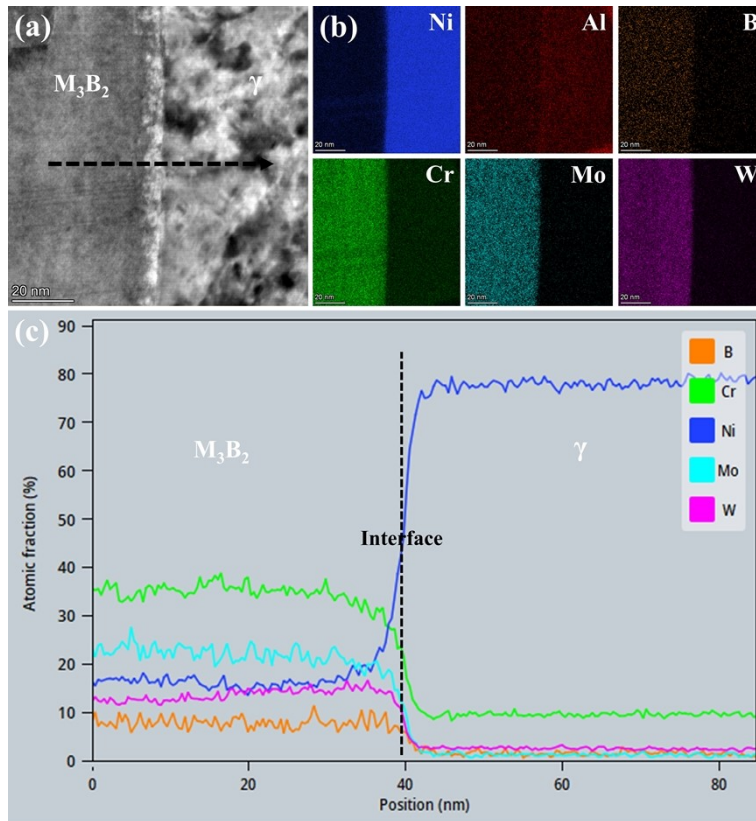

Figure S7. TEM analysis of the  $M_3B_2/\gamma$  interface. (a) A bright-field TEM image. (b) STEM-EDS mapping corresponding to each element of the region in (a). (c) Line scan results in (a)

Table S3. The formation enthalpy ( $\Delta H_f$ ) for all studied binary borides<sup>1</sup>

| Phase                           | $\Delta H_f$ | Phase                           | $\Delta H_f$ | Phase                          | $\Delta H_f$ |
|---------------------------------|--------------|---------------------------------|--------------|--------------------------------|--------------|
| Cr <sub>23</sub> B <sub>6</sub> | -17.47       | Mo <sub>23</sub> B <sub>6</sub> | -18.47       | W <sub>23</sub> B <sub>6</sub> | -15.74       |
| Cr <sub>3</sub> B               | -17.26       | Mo <sub>3</sub> B               | -23.62       | W <sub>3</sub> B               | -17.26       |
| Cr <sub>5</sub> B <sub>3</sub>  | -47.87       | Mo <sub>5</sub> B <sub>3</sub>  | -42.31       | W <sub>5</sub> B <sub>3</sub>  | -31.96       |
| Cr <sub>3</sub> B <sub>2</sub>  | -49.42       | Mo <sub>3</sub> B <sub>2</sub>  | -45.68       | W <sub>3</sub> B <sub>2</sub>  | -33.96       |
| CrB                             | -59.99       | MoB                             | -58.31       | WB                             | -43.79       |

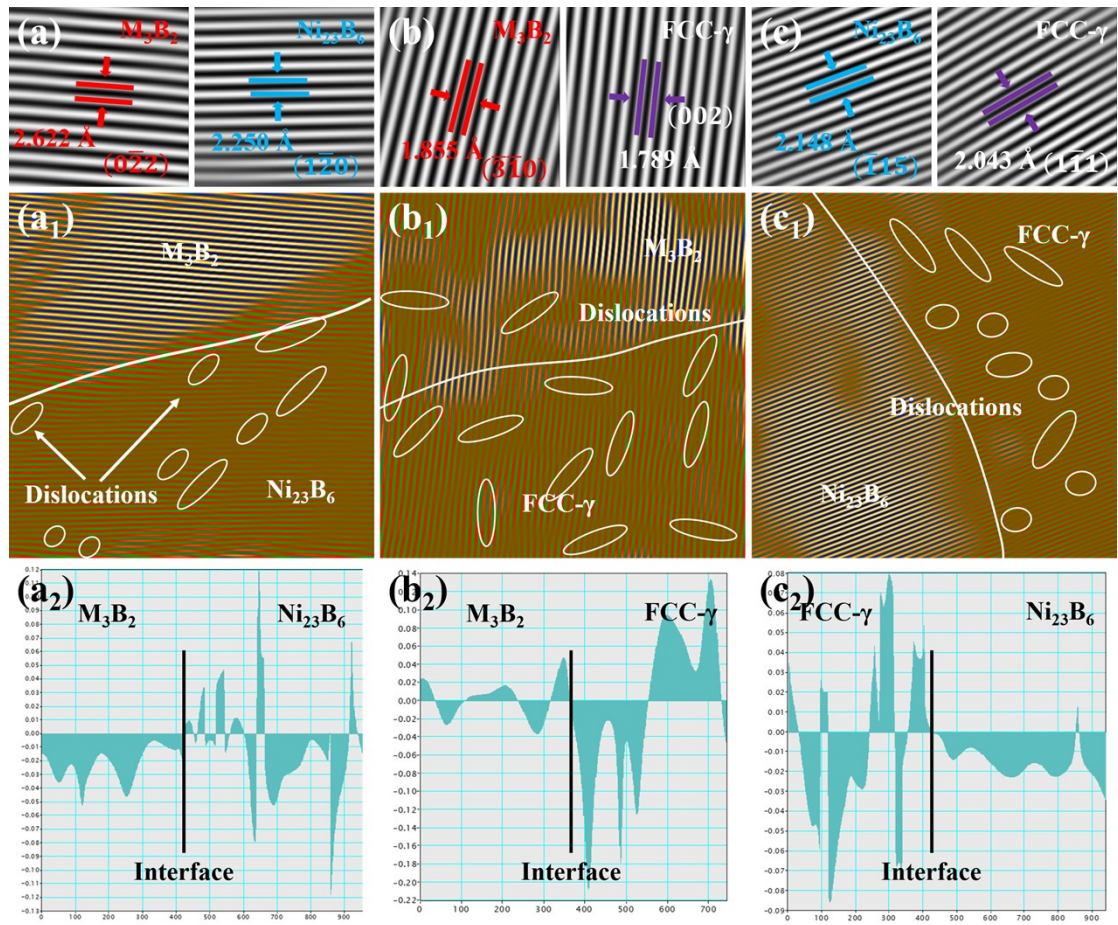

Figure S8. Nanoindentation results across different regions of the joints. (a) SC-joint. (b) SS-joint.

## References

- 1 H. K. Zhang, J. S. Chen, L. X. Zhang, et al., *Phase Transitions*, 2020, 93, 158–174, DOI:10.1080/01411594.2019.1692015.
